# Supplementary material
Source: publisher figshare collection journal article supplement (https://gsajournals.figshare.com/ndownloader/files/21830205)
Supplement: Supplementary file 1 [file 21830205]

## Sheet: Sheet1
Table S1
Filter	SNPs	Tags
None	222668	94002
50% genotype rate	135822	60541
0.05 MAF	54842	36118
Paralogs removed	45639	31919
90% genotype rate	30006	22693
Results of RADseq marker filtering by step. The first column lists the filter applied. The SNPs column lists the number of SNPs retained after this filter while the Tags column lists the number of RAD tags retained after this filter.
